# Supplementary material for: Cristae architecture is determined by an interplay of the MICOS complex and the F1FO ATP synthase via Mic27 and Mic10
Source: PubMed Central journal article supplement (PMC5568431; doi:10.15698/mic2017.08.585), 2017-07-20
Supplement: mic-04-259-s01.pdf [file mic-04-259-s01.pdf]

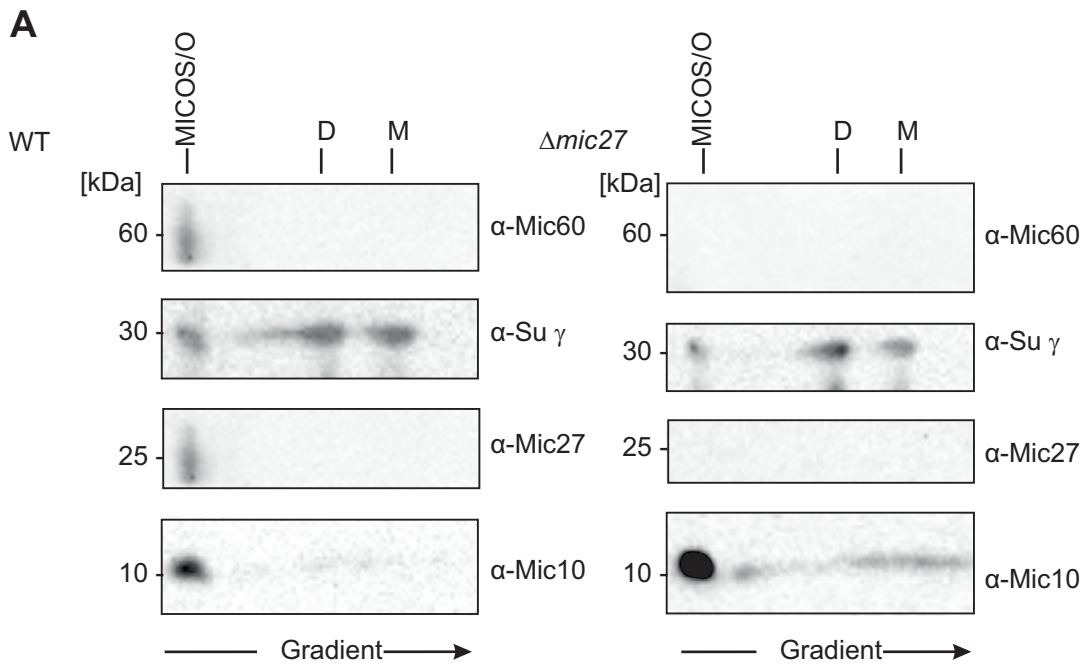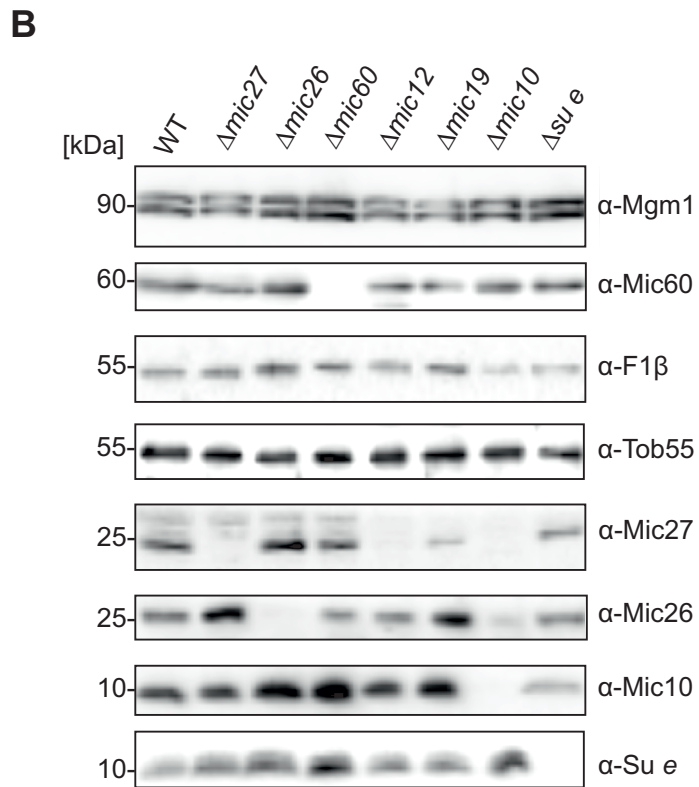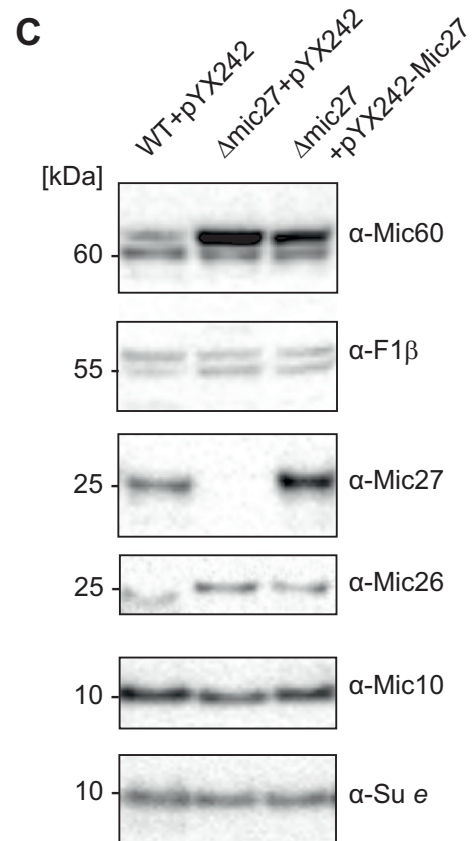

## Supplemental figure legends

### **Supplemental Figure 1. Mic27 is required to stabilize the MICOS complex but not for formation of a high molecular weight complex containing Mic10. A, 2D BN-PAGE.**

Isolated mitochondria of a wildtype and a  $\Delta mic27$  yeast strain were solubilized with digitonin (ratio: digitonin to protein 2g/g) and separated by BN-PAGE (1<sup>st</sup> dimension) and excised gel strips were used for Tris-tricine SDS-PAGE (2<sup>nd</sup> dimension), and western blot analysis was performed. Monomers (M), dimers (D), and oligomers of the F<sub>1</sub>F<sub>0</sub>-ATP synthase (O) are indicated. **B**, Mic27 and other subunits were tested for their expression in MICOS deletion mutant strains and in  $\Delta su e$  cells by western blot analysis. Indicated mitochondrial marker proteins were analyzed, Mgm1, Sam50/Tob55, F1 $\beta$  and Su e, and subunits of the MICOS-complex, Mic60, Mic10, Mic26, and Mic27. **C**, Validation of Mic27 overexpression using a  $\Delta mic27$  strain transformed with pYX242-Mic27. Mic27 and other subunits were tested for their expression in the indicated strains. A wild type and a  $\Delta mic27$  yeast strain harboring the empty vector (pYX242) were used as controls. Indicated mitochondrial marker proteins were analyzed, F1 $\beta$  and Su e and subunits of the MICOS-complex: Mic60, Mic10, Mic26, and Mic27, using western blot analysis.
